# Supplementary material for: Structure and dynamics of the E. coli chemotaxis core signaling complex by cryo-electron tomography and molecular simulations
Source: PubMed Central journal article supplement (PMC6954272; doi:10.1038/s42003-019-0748-0), 2020-01-10
Supplement: 42003_2019_748_MOESM2_ESM.pdf [file 42003_2019_748_MOESM2_ESM.pdf]

**Supplementary Movie 1.** Longitudinal slicing through overlay between 4Q (purple) and QEQE (green) density maps.

**Supplementary Movie 2.** MDFF refinement of Tsr trimer-of-dimers models with starting positions shifted in the Z-direction by +15 Å (left) and -15 Å (right) relative to the initial rigid docking.

**Supplementary Movie 3.** Longitudinal slicing through overlay between 4Q density map and atomic model of the *E. coli* core signalling unit.

**Supplementary Movie 4.** Final frame from an “undipped” core signaling unit simulation in which the CheA.P3 domain has adopted an asymmetric position, giving rise to different P4-P5 interactions in each CheA monomer. CheA.P5 and CheW are shown with a transparent representation for clarity.
